# Supplementary material
Source: PubMed Central journal article supplement (PMC5505312)
Supplement: NIHMS868313-supplement-supplement_1.pdf [file NIHMS868313-supplement-supplement_1.pdf]

Supplemental Table 1. Clinical characteristics of individuals untreated for hypertension stratified by age

| Variable                             | <52 yr<br>(n=190)      | ≥52 yr<br>(n=176)      | P-value |
|--------------------------------------|------------------------|------------------------|---------|
| Age (year)                           | 42 ± 7                 | 58 ± 4                 | <0.001  |
| Male, n (%)                          | 70 (37)                | 77 (43.8)              | 0.107   |
| Body mass index (kg/m <sup>2</sup> ) | 29.5 (20-55.5)         | 29.2 (18.8-37.6)       | 0.222   |
| Waist circumference (cm)             | 100 ± 15               | 101 ± 11               | 0.722   |
| Non-Hispanic White, n(%)             | 106 (55.8)             | 133 (75.6)             | <0.001  |
| Systolic BP (mmHg)                   | 120 ± 14               | 124 ± 15               | 0.005   |
| Diastolic BP (mmHg)                  | 74 ± 9                 | 75 ± 9                 | 0.276   |
| Pulse pressure (mmHg)                | 46 ± 10                | 49 ± 11                | 0.005   |
| Heart rate (/min)                    | 71 ± 9                 | 67 ± 9                 | <0.001  |
| NBP/PreHTN/HTN, n (%)                | 98/66/26<br>(51/35/14) | 65/80/31<br>(37/45/18) | 0.019   |
| SSPG,mg/dL                           | 154 (41-323)           | 148 (48-332)           | 0.639   |
| SSPG tertile, n(%)                   | 69/64/57<br>(36/34/30) | 65/55/56<br>(37/31/32) | 0.872   |
| FPG (mg/dL)                          | 95 (73-123)            | 100 (71-126)           | <0.001  |
| Total cholesterol (mg/dL)            | 186 (116-358)          | 198 (125-361)          | <0.001  |
| LDL-cholesterol (mg/dL)              | 119 ± 30               | 127 ± 32               | 0.015   |
| HDL-cholesterol (mg/dL)              | 45 ± 11                | 49 ± 14                | 0.001   |
| Triglycerides (mg/dL)                | 105 (32-800)           | 111 (29-1217)          | 0.662   |

Data are shown as mean±SD, median (range) or as number (%).

NBP: normal blood pressure; PreHTN: prehypertension; SSPG: steady-state plasma glucose; LDL: low density lipoprotein; HDL: high density lipoprotein

Supplemental Table 2. Prevalence of HTN status according to SSPG tertiles in untreated individuals

| Variable                | SSPG Tert1 | SSPG Tert2 | SSPG Tert3 | p value |
|-------------------------|------------|------------|------------|---------|
| <b>Age &lt;52 years</b> |            |            |            |         |
| NBP                     | 38 (55.1%) | 36 (56.3%) | 24 (42.1%) | 0.401   |
| Prehypertension         | 23 (33.3%) | 18 (28.1%) | 25 (43.9%) |         |
| Hypertension            | 8 (11.6%)  | 10 (15.6%) | 8 (14.0%)  |         |
| <b>Age ≥ 52 years</b>   |            |            |            |         |
| NBP                     | 35 (53.8%) | 20 (36.4%) | 10 (17.9%) | 0.001   |
| Prehypertension         | 19 (29.2%) | 28 (50.9%) | 33 (58.9%) |         |
| Hypertension            | 11 (16.9%) | 7 (12.7%)  | 13 (23.2%) |         |

Data was presented as number (percentage).  
p-value was calculated by chi-squared test.

Supplemental Table 3. Age and insulin resistance (SSPG) as predictors of systolic and diastolic blood pressure stratified age in untreated individuals for hypertension

| Variable                                 | Model1 |      |         |        | Model2 |      |         |        |  |
|------------------------------------------|--------|------|---------|--------|--------|------|---------|--------|--|
|                                          | B      | SE   | $\beta$ | p      | B      | SE   | $\beta$ | p      |  |
| <b>systolic blood pressure</b>           |        |      |         |        |        |      |         |        |  |
| <b>In Age&lt;52 (N=190)</b>              |        |      |         |        |        |      |         |        |  |
| Age (10year)                             | 4.27   | 1.53 | 0.2     | 0.006  | 4.21   | 1.56 | 0.20    | 0.008  |  |
| SSPG (50mg/dL)                           | 1.11   | 0.74 | 0.11    | 0.135  | -0.37  | 0.88 | -0.04   | 0.675  |  |
| <b>In Age<math>\geq</math>52 (N=176)</b> |        |      |         |        |        |      |         |        |  |
| Age (10year)                             | 2.71   | 2.45 | 0.08    | 0.269  | 2.73   | 2.49 | 0.08    | 0.273  |  |
| SSPG (50mg/dL)                           | 3.31   | 0.78 | 0.31    | <0.001 | 3.38   | 0.95 | 0.31    | <0.001 |  |
| <b>diastolic blood pressure</b>          |        |      |         |        |        |      |         |        |  |
| <b>In Age&lt;52 (N=190)</b>              |        |      |         |        |        |      |         |        |  |
| Age (10year)                             | 3.17   | 1.01 | 0.23    | 0.002  | 2.69   | 1.01 | 0.20    | 0.009  |  |
| SSPG (50mg/dL)                           | 0.34   | 0.49 | 0.05    | 0.482  | 0.41   | 0.57 | 0.06    | 0.478  |  |
| <b>In Age<math>\geq</math>52 (N=176)</b> |        |      |         |        |        |      |         |        |  |
| Age (10year)                             | -1.86  | 1.62 | -0.09   | 0.252  | -1.81  | 1.48 | -0.08   | 0.225  |  |
| SSPG (50mg/dL)                           | 1.46   | 0.51 | 0.21    | 0.005  | 1.30   | 0.57 | 0.19    | 0.022  |  |

B=regression coefficient; SE=standard error;  $\beta$ =standardized regression coefficient.

Model1 were calculated after adjustment for age and SSPG as covariates.

Model2 were calculated after adjustment for age, sex, ethnicity, BMI, WC, heart rate, and SSPG as covariates.
